# Supplementary material
Source: publisher figshare collection journal article supplement (https://frontiersin.figshare.com/ndownloader/files/25181273)
Supplement: Supplementary file 1 [file 25181273]

Supplementary information 1: List of forty-five experts, their affiliated organisation and the thematic group(s) to which they contributed expertise for horizon scanning workshop (27-29 November 2019) to predict the arrival and establishment of Invasive Alien Species which have the potential to pose a threat to human health and / or economies within Cyprus. The five thematic groups comprised: plant species (terrestrial and freshwater), freshwater animals (fish and invertebrates), terrestrial invertebrates, terrestrial vertebrates and marine species (primary producers, invertebrates and vertebrates).

| **Full name** | **Organisation** | **Thematic group** |
| --- | --- | --- |
| Tim Adriaens | Research Institute for Nature and Forest (INBO), Belgium | Terrestrial vertebrates |
| Margarita Arianoutsou | National and Kapodistrian University of Athens, Greece | Plants |
| Sven Bacher | University of Fribourg, Switzerland | Terrestrial vertebrates |
| Ioannis Bazos | National and Kapodistrian University of Athens, Greece | Plants |
| Giuseppe Brundu | Department of Agriculture, Italy | Plants |
| Elizabeth Bruno-McClung | Joint Services Health Unit, SBA Cyprus | Terrestrial vertebrates |
| Iris Charalambidou | University of Nicosia, Cyprus | Terrestrial vertebrates |
| Niki Chartosia | University of Cyprus, Cyprus | Marine |
| Monica Demetriou | University of Cyprus, Cyprus | Marine |
| Maria Galanidi Bingkiol | Ustun Energy Engineering LLC, Greece | Marine |
| Bella Galil | Steinhardt Museum of Natural History, Tel Aviv University, Israel | Marine |
| Rhian Guillem | Gibraltar Botanic Gardens, Gibraltar | Terrestrial invertebrates |
| Kypros Hadjiafxentis | Department of Agriculture, Cyprus | Terrestrial invertebrates / Plants |
| Louis Hadjioannou | Enalia Physis Environmental Research Centre, Cyprus | Marine |
| Margarita Hadjistylli | Department of Environment, Cyprus | Terrestrial vertebrates |
| Jason Hall-Spencer | University of Plymouth, UK | Marine |
| Carlos Jimenez | Enalia Physis Environmental Research Centre, Cyprus | Marine |
| Graham Johnstone | Sovereign Base Area Administration, Environmental Dept, SBA Cyprus | Terrestrial vertebrates |
| Paraskevi Karachle | Hellenic Centre for Marine Research, Greece | Marine |
| Periklis Kleitou | Marine & Environmental Research (MER) Lab, Cyprus | Marine |
| Demetris Kletou | Marine & Environmental Research (MER) Lab, Cyprus | Marine |
| Despina Koukkoularidou | Department of Agriculture, Louki Akrita, 1412, Cyprus | Terrestrial invertebrates / Plants |
| Stalo Leontiou | Open University of Cyprus, Cyprus | Marine |
| Norbert Maczey | Cabi, UK | Terrestrial invertebrates |
| Kelly Martinou | Joint Services Health Unit, Cyprus | Freshwater animals |
| Nikolas Michailidis | Department of Fisheries and Marine Research, Cyprus | Marine |
| Owen Mountford | UK Centre for Ecology & Hydrology, UK | Plants |
| Athina Papatheodoulou | I.A.CO Environmental and Water Consultant Ltd, Cyprus | Freshwater animals |
| Jodey Peyton | UK Centre for Ecology & Hydrology, UK | Plants |
| Oliver Pescott | UK Centre for Ecology & Hydrology, UK | Plants |
| Constantinos Phanis | Cyprus Ministry of Education, Cyprus | Terrestrial invertebrates |
| Cristina Preda | Ovidius University of Constanta, Romania | Terrestrial invertebrates |
| Wolfgang Rabitsch | Environment Agency Austria, Austria | Terrestrial invertebrates |
| Helen Roy | UK Centre for Ecology & Hydrology, UK | Terrestrial invertebrates |
| Richard Shaw | Cabi, UK | Plants |
| Wojciech Solarz | Institute of Nature Conservation, Polish Academy of Sciences, Poland | Terrestrial vertebrates |
| Chris Taylor | Joint Services Health Unit, SBA Cyprus | Freshwater animals |
| Saso Trajanovski | Hydrobiological Institute Ohrid, North Macedonia | Freshwater animals |
| Elena Tricarico | University of Florence, Italy | Freshwater animals |
| Iakovos Tziortzis | Water Development Department, Cyprus | Freshwater animals |
| Elli Tzirkalli | Department of Biological Applications and Technology, University of Ioannina, Cyprus | Terrestrial invertebrates |
| Ahmet Uludag | Plant Protection Department, Faculty of Agriculture, Turkey | Plants |
| Giovanni Vimercati | University of Fribourg, Switzerland | Terrestrial vertebrates |
| Konstantin Zdraveski | Public Institution National Park Galicica, North Macedonia | Freshwater animals |
| Argyro Zenetos | Hellenic Centre for Marine Research, Greece | Marine |
